# Supplementary material for: Enhanced electrical properties of antimony doped tin oxide thin films deposited via aerosol assisted chemical vapour deposition
Source: Royal Society of Chemistry journal article supplement (doi:10.1039/c8tc01929k), 2018-01-01
Supplement: c8tc01929k1.pdf [file c8tc01929k1.pdf]

### Supporting information

#### **Enhanced electrical properties of antimony doped tin oxide thin films deposited *via* aerosol assisted chemical vapour deposition**

Sapna D. Ponja<sup>a</sup>, Benjamin A. D. Williamson<sup>ab</sup>, Sanjayan Sathasivam<sup>a</sup>, David O. Scanlon<sup>abc</sup>, Ivan P. Parkin<sup>a</sup> and Claire J. Carmalt<sup>a\*</sup>

\*Corresponding author

<sup>a</sup>Materials Chemistry Centre, Department of Chemistry, University College London, 20 Gordon Street, London WC1H 0AJ, UK

E-mail: [c.j.carmalt@ucl.ac.uk](mailto:c.j.carmalt@ucl.ac.uk)

<sup>b</sup>Thomas Young Centre, University College London, Gower Street, London WC1E 6BT, United Kingdom.

<sup>c</sup>Diamond Light Source Ltd., Diamond House, Harwell Science and Innovation Campus, Didcot, Oxfordshire OX11 0DE, UK.

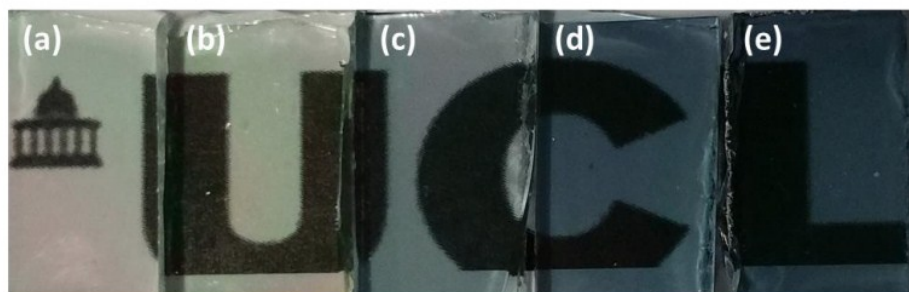

**Figure S1: Photograph showing the visible light transparency and change in blue colour of the a)  $\text{SnO}_2$ , b)  $\text{Sn}_{0.99}\text{Sb}_{0.01}\text{O}_2$  c)  $\text{Sn}_{0.96}\text{Sb}_{0.04}\text{O}_2$ , d)  $\text{Sn}_{0.93}\text{Sb}_{0.07}\text{O}_2$  and e)  $\text{Sn}_{0.90}\text{Sb}_{0.10}\text{O}_2$**

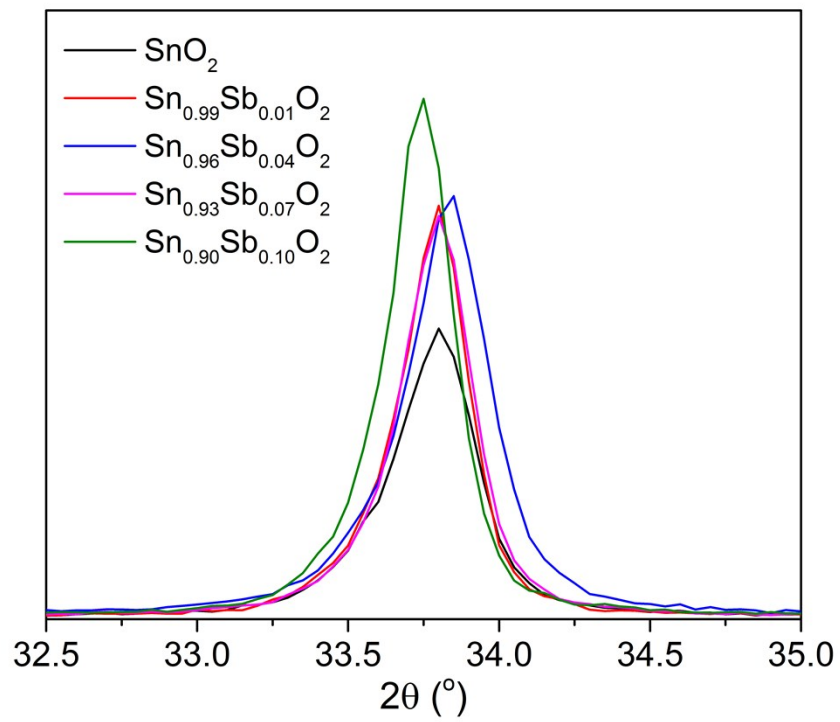

**Figure S2: The SnO<sub>2</sub> (101) reflection for the undoped and ATO films showing a shift in the peak positions upon doping.**
